# Supplementary material for: Vitamin D Supply of Multivitamins Commercialized Online by Amazon in Western and Southern Europe: A Labeling Analysis
Source: MDPI journal article supplement (doi:10.3390/nu15020326), 2023-01-09
Supplement: s1 [file s1]

**Table S1.** Vitamin composition and daily vitamin D<sub>3</sub> supply provided by 77 multivitamin supplements commercialized by amazon.es®.

|                                                                                     | A | B <sub>1</sub> | B <sub>2</sub> | B <sub>3</sub> | B <sub>5</sub> | B <sub>6</sub> | B <sub>7</sub> | B <sub>8</sub> | B <sub>9</sub> | B <sub>12</sub> | C | E | K | D <sub>3</sub> (units/day) |
|-------------------------------------------------------------------------------------|---|----------------|----------------|----------------|----------------|----------------|----------------|----------------|----------------|-----------------|---|---|---|----------------------------|
| Vitamix liquid multivitamins                                                        |   | •              | •              | •              |                | •              |                | •              | •              | •               |   |   |   | 16                         |
| Natures Plus Source of Life Multivitaminico                                         |   | •              | •              | •              | •              | •              |                | •              | •              | •               | • | • |   | 65                         |
| Neo peques Gummies Vitazinc                                                         | • |                |                |                |                | •              |                | •              | •              | •               | • | • |   | 75                         |
| Sotya Jalea Real con Vitaminas                                                      | • | •              | •              | •              | •              | •              |                | •              | •              | •               | • | • | • | 90                         |
| Vitamix plus suplemento alimenticio                                                 | • | •              | •              | •              | •              | •              |                | •              | •              | •               | • | • |   | 100                        |
| Solgar Female Múltiple                                                              |   | •              | •              | •              | •              | •              |                | •              | •              | •               | • | • | • | 130                        |
| Fostprint plus Complemento Energético                                               |   |                |                |                | •              |                |                |                |                | •               | • | • |   | 185                        |
| Glory Feel Multivitaminas                                                           | • | •              | •              | •              | •              | •              |                | •              | •              | •               | • |   |   | 200                        |
| Nature by Glory Feel Multivitaminas                                                 | • | •              | •              | •              | •              | •              |                | •              | •              | •               | • | • |   | 200                        |
| Apisérum Vitalidad                                                                  | • | •              | •              | •              | •              | •              |                | •              | •              | •               | • | • |   | 200                        |
| Multicentrum efervescente para adulto                                               |   | •              | •              | •              | •              | •              |                | •              | •              | •               | • |   | • | 200                        |
| Vitamaze Multivitamin Daily                                                         | • | •              | •              | •              | •              | •              |                | •              | •              | •               | • | • | • | 200                        |
| Multicentrum Complemento Alimenticio Multivitaminas con 13 Vitaminas y 11 Minerales | • | •              | •              | •              | •              | •              |                | •              | •              | •               | • | • | • | 200                        |
| Pharmaton Mujer Vitaminas y minerales                                               | • | •              | •              | •              | •              | •              |                | •              | •              | •               | • | • |   | 200                        |
| Vitamaze Multivitamin + Mineralstoffe A-Z                                           | • | •              | •              | •              | •              | •              |                | •              | •              | •               | • | • |   | 200                        |
| Solaray Spectro Energy Multivitamin                                                 | • | •              | •              | •              | •              | •              |                | •              | •              | •               | • | • |   | 200                        |
| Weider-Green Vitamin Complex                                                        | • | •              | •              | •              | •              | •              |                | •              | •              | •               | • | • | • | 200                        |
| Solgar Nutrientes Prenatales                                                        | • | •              | •              | •              | •              | •              |                | •              | •              | •               | • | • |   | 200                        |
| Apisérum Energia Vitamax                                                            | • | •              | •              | •              | •              | •              |                | •              | •              | •               | • | • |   | 200                        |
| Sundt supplements liposomales multivitamin                                          | • | •              | •              | •              | •              | •              |                | •              | •              | •               | • | • |   | 200                        |
| MARNYS Cebida Multivitaminico                                                       | • | •              |                | •              |                | •              |                |                |                |                 | • |   |   | 200                        |
| Sanct Bernhard A-Z cápsulas                                                         | • | •              | •              | •              | •              | •              |                | •              | •              | •               | • | • | • | 200                        |
| SimplySupplements selenium with multivitamins and iron                              | • |                |                |                |                |                |                |                |                |                 | • | • |   | 200                        |
| SimplySupplements selenium with multivitamins and iron                              | • |                |                |                |                |                |                |                |                |                 | • | • |   | 200                        |
| Black Bee Pharmacy Jalea Multivitaminas                                             | • | •              | •              | •              | •              | •              |                | •              | •              | •               | • | • |   | 200                        |
| Leotrol energia vitaminas                                                           | • | •              | •              | •              | •              | •              |                | •              | •              | •               | • | • |   | 200                        |
| Leotron vitalidad complex                                                           | • | •              | •              | •              | •              | •              |                |                | •              |                 | • | • |   | 200                        |
| Sundt supplements liposomales multivitamin                                          | • | •              | •              | •              | •              | •              |                | •              | •              | •               | • | • |   | 200                        |
| La santé par nature Vitamino immuné-fatigue                                         | • | •              | •              | •              | •              | •              |                | •              | •              | •               | • | • |   | 200                        |
| Fostprint sport Complemento Energético con Aminoácidos                              |   |                |                |                |                |                |                |                |                | •               | • | • |   | 200                        |
| Leotron energia mujer                                                               | • | •              | •              | •              | •              | •              |                | •              | •              | •               | • | • |   | 200                        |
| Black Bee Jalea Real Inmuno Plus                                                    |   |                | •              |                |                | •              |                |                |                |                 |   | • |   | 200                        |
| Forte Pharma Energy Multivit Adulto                                                 | • | •              | •              | •              | •              | •              |                | •              | •              | •               | • | • |   | 200                        |
| Victory Endurance All Day Energy                                                    | • | •              | •              | •              | •              | •              |                | •              | •              | •               | • | • |   | 200                        |
| Forte Pharma Multivit Adulto                                                        | • | •              | •              | •              | •              | •              |                | •              | •              | •               | • | • |   | 200                        |
| Simply supplements eye health multivitamin                                          |   | •              |                |                |                |                |                |                |                |                 | • | • |   | 200                        |
| Blissdefense multivitaminico para las defensas y sistema inmunario                  |   |                |                |                |                |                |                |                |                |                 | • |   |   | 200                        |
| Biotech USA Multivitamin for Men                                                    | • | •              | •              | •              | •              | •              |                | •              | •              | •               | • | • |   | 200                        |
| PWD Vitalife Vitamins, minerals and antioxidants                                    | • | •              | •              | •              | •              | •              |                | •              | •              | •               | • | • |   | 200                        |
| Victory Endurance All Day Energy vitamins and minerals                              | • | •              | •              | •              | •              | •              |                | •              | •              | •               | • | • |   | 200                        |

[illegible]

**Table S2.** Vitamin composition and daily vitamin D<sub>3</sub> supply provided by 73 multivitamin supplements commercialized by amazon.de®.

|                                                                                    | A | B <sub>1</sub> | B <sub>2</sub> | B <sub>3</sub> | B <sub>5</sub> | B <sub>6</sub> | B <sub>7</sub> | B <sub>8</sub> | B <sub>9</sub> | B <sub>12</sub> | C | E | K | D <sub>3</sub> (units/day) |
|------------------------------------------------------------------------------------|---|----------------|----------------|----------------|----------------|----------------|----------------|----------------|----------------|-----------------|---|---|---|----------------------------|
| WARNKE heart vitamins multivitamin                                                 | • | •              | •              | •              | •              | •              |                | •              | •              | •               | • | • |   | 67                         |
| WARNKE rich eye multivitamin                                                       |   | •              | •              | •              | •              | •              |                | •              | •              | •               | • | • |   | 68                         |
| Fairvital Longevity multivitamin and multimineral                                  |   | •              | •              | •              | •              | •              |                | •              | •              | •               | • | • |   | 84                         |
| Zec+ All in One antioxidants & Vitamins                                            | • | •              | •              | •              | •              | •              | •              |                |                | •               | • | • | • | 100                        |
| TNT Multivitamin Powder High dose Superfood Vitamin Complex                        | • | •              | •              | •              | •              | •              |                | •              | •              | •               | • | • |   | 100                        |
| Vita2you Multi-Vitamin Caosules Vitamins & Minerals—Premium Quality                | • | •              | •              | •              | •              | •              |                | •              | •              | •               | • | • | • | 100                        |
| Seuren nutrient Super Multi Compleet                                               | • | •              | •              | •              | •              | •              | •              |                | •              | •               | • | • |   | 100                        |
| Pure encapsulations nutrient 950E capsules                                         | • | •              | •              | •              | •              | •              |                | •              | •              | •               | • | • |   | 134                        |
| EUNOVA Langzeit 50+ dietary supplement and multivitamin with minerals ‡            | • | •              | •              | •              | •              | •              |                | •              | •              | •               | • | • | • | 152                        |
| Vitamaze high-dose multivitamin capsules                                           | • | •              | •              | •              | •              | •              | •              |                | •              | •               | • | • |   | 200                        |
| Glory feel multivitamin                                                            | • | •              | •              | •              | •              | •              |                | •              | •              | •               | • | • |   | 200                        |
| Doppelherz A–Z effervescent tablets orange passion flavour multivitamin supplement | • | •              | •              | •              | •              | •              |                | •              | •              | •               | • | • | • | 200                        |
| CYB A–Z vitamins & minerals for men                                                | • | •              | •              | •              | •              | •              |                | •              | •              | •               | • | • | • | 200                        |
| Sanct Bernhard A–Z capsules multivitamin and mineral                               | • | •              | •              | •              | •              | •              |                | •              | •              | •               | • | • | • | 200                        |
| CYB A–Z Vitamins & Minerals for Women                                              | • | •              | •              | •              | •              | •              |                | •              | •              | •               | • | • | • | 200                        |
| RENIGHT Multivitamin + Multimineral                                                | • | •              | •              | •              |                | •              |                | •              |                | •               | • | • | • | 200                        |
| Biotech USA Multivitamin                                                           | • | •              | •              | •              | •              | •              |                | •              | •              | •               | • | • |   | 200                        |
| BEARS WITH BENEFITS Immunboost gummy bears                                         | • |                |                |                |                | •              |                |                | •              | •               | • | • |   | 200                        |
| Multivitamin Vitamin Juice Liposomal                                               | • | •              | •              | •              | •              | •              |                | •              | •              | •               | • | • |   | 200                        |
| Fair vital daily multi vitamin complex                                             | • | •              | •              | •              | •              | •              |                | •              | •              | •               | • | • | • | 200                        |
| MED complete multi vitamin capsules                                                | • | •              | •              | •              | •              | •              |                | •              | •              | •               | • | • | • | 200                        |
| IronMaxx Multivitamin Capsules                                                     | • | •              | •              | •              | •              | •              |                | •              | •              | •               | • | • | • | 200                        |
| My protein daily multi vitamin                                                     | • | •              | •              | •              |                |                |                |                |                |                 | • | • |   | 200                        |
| A–Z generation 50+ multivitamin ‡                                                  | • | •              | •              | •              | •              | •              |                | •              | •              | •               | • | • | • | 200                        |
| Hermes multivit                                                                    | • | •              | •              | •              | •              | •              |                | •              | •              | •               | • | • | • | 200                        |
| Doppelherz vegetariants vitamins + minerals                                        |   | •              | •              |                |                | •              |                |                |                | •               |   |   |   | 200                        |
| Lindens multivitamin A to Z                                                        | • | •              |                | •              |                | •              |                |                | •              |                 | • | • |   | 200                        |
| Frubiase Sport Orange Effervescent Tablets                                         |   | •              | •              | •              | •              | •              |                | •              | •              | •               | • | • |   | 200                        |
| Via vitamine multi vitamin and mineral A to Z                                      | • | •              | •              | •              | •              | •              |                | •              | •              | •               | • | • | • | 200                        |
| Gloryfeel high dose multivitamin                                                   |   | •              | •              | •              | •              |                |                | •              | •              | •               | • | • |   | 200                        |
| Nature by gloryfeel premium multivitamin extensive complex with bioactive forms    | • | •              | •              | •              | •              | •              |                | •              | •              | •               | • | • |   | 200                        |
| Fat2fit nutrition multivitamin A–Z                                                 | • | •              | •              | •              | •              | •              |                | •              | •              | •               | • | • | • | 200                        |
| Medicus institute sinavita multivitamin capsules                                   | • | •              | •              | •              | •              | •              |                | •              | •              | •               | • | • |   | 200                        |
| Vita world natal multivitamin                                                      | • | •              | •              | •              | •              | •              |                | •              | •              | •               | • | • |   | 250                        |
| Vitaworld multivitamin A–Z                                                         | • | •              | •              | •              | •              | •              |                | •              | •              | •               | • | • |   | 250                        |
| Nutrilite double X amway Nahrungsergänzungsmittel                                  | • | •              | •              |                | •              | •              |                | •              | •              | •               | • | • |   | 300                        |
| All stars multivitamin                                                             | • | •              | •              |                | •              | •              |                | •              | •              | •               | • | • |   | 336                        |
| Opti Men Nahrungsergänzungsmittel                                                  | • | •              | •              | •              | •              | •              |                | •              | •              | •               | • | • | • | 400                        |
| Multivitamin energetic salus                                                       | • | •              | •              | •              |                | •              |                |                |                |                 | • | • |   | 400                        |
| BioTechUSA Multivitamin for Women                                                  | • | •              | •              | •              | •              | •              |                | •              | •              | •               | • | • |   | 400                        |
| Heidelberger Chlorella Multivitamin active                                         | • | •              | •              | •              | •              | •              |                |                | •              | •               | • | • |   | 400                        |

|                                                                                                                  |   |   |   |   |   |   |   |   |   |   |   |   |   |   |   |      |
|------------------------------------------------------------------------------------------------------------------|---|---|---|---|---|---|---|---|---|---|---|---|---|---|---|------|
| Dietary supplement VM2000 multi vitamin Mineral                                                                  | • | • | • | • | • | • | • | • | • | • | • | • | • | • | • | 400  |
| Solgar female multiple vitamin and mineral                                                                       | • | • | • | • | • | • | • | • | • | • | • | • | • | • | • | 400  |
| Now foods adam men superior multi multivitamins                                                                  | • | • | • | • | • | • | • | • | • | • | • | • | • | • | • | 500  |
| Optimum nutrition opti-women damen multivitamin                                                                  | • | • | • | • | • | • | • | • | • | • | • | • | • | • | • | 600  |
| Pure Encapsulations All-In-One 50+ Multivitamin for more active ageing                                           | • | • | • | • | • | • | • | • | • | • | • | • | • | • | • | 600  |
| Lameda Multivitamin Man                                                                                          | • | • | • | • | • | • | • | • | • | • | • | • | • | • | • | 600  |
| Olimp vitamin                                                                                                    |   | • | • |   |   | • |   |   | • | • | • |   |   |   |   | 600  |
| Vitasprint pro immune bottle – natural dietary supplement to activate defences                                   |   |   |   |   |   | • |   |   |   |   | • |   |   |   |   | 600  |
| Jamieson multivitamin                                                                                            | • | • | • | • | • | • | • | • | • | • | • | • | • | • | • | 600  |
| ESN Vitamin Stack Multivitamin Supplements                                                                       | • | • | • | • |   | • | • | • | • | • | • | • | • | • | • | 800  |
| Natural éléments premium multi multivitamin—comprehensive complex with bioactive forms and premium raw materials | • | • | • | • | • | • | • | • | • | • | • | • | • | • | • | 800  |
| Veganvitality vegan multivitamins and minerals with highly effective vitamins                                    | • | • | • | • | • | • | • | • | • | • | • | • | • | • | • | 800  |
| Deva multivitamin and mineral supplement                                                                         | • | • | • | • | • | • | • | • | • | • | • | • | • | • | • | 800  |
| VinceroL Plus Immun Kur Multivitamin                                                                             | • | • | • | • | • | • | • | • |   | • | • | • | • | • | • | 800  |
| Health Germany femibion vitamine und minerakstoffe                                                               |   | • | • | • | • | • | • | • | • | • | • | • | • | • | • | 800  |
| Vital women multivitamin daily oral immune system booster supplement                                             | • | • | • | • | • | • | • | • | • | • | • | • | • | • | • | 800  |
| Bayer one-a-day women’s formula complete multivitamin                                                            | • | • |   | • | • | • | • | • | • | • | • | • | • | • | • | 1000 |
| Greenleaves vitamins—every day multivitamin                                                                      | • | • | • | • | • | • | • | • | • | • | • | • | • | • | • | 1000 |
| Now foods eve superior multivitamin for women                                                                    | • | • | • | • | • | • | • | • | • | • | • | • | • | • | • | 1000 |
| Multi complete multivitamin & mineral—Komplex Vegan                                                              | • | • |   |   |   |   |   |   |   | • |   |   |   |   | • | 1000 |
| Weider multivitamin complete A–Z premium complex with bioactive vitamins, trace elements and vegetable nutrients | • | • | • | • | • | • | • | • | • | • | • | • | • | • | • | 1000 |
| Nutri advances multi-essentials women’s multivitamin + mineral complex                                           | • | • | • | • | • | • | • | • | • | • | • | • | • | • | • | 1000 |
| Designs for health multivitamin                                                                                  | • | • | • | • | • | • | • | • | • | • | • | • | • | • | • | 1000 |
| Smarty pants women’s complete multivitamin dietary supplement                                                    | • | • | • | • | • | • | • | • | • | • | • | • | • | • | • | 1000 |
| NOW foods adam multivitamin                                                                                      | • | • | • | • | • | • | • | • | • | • | • | • | • | • | • | 1000 |
| Simply supplements 50 plus formula ‡                                                                             | • | • |   |   |   |   |   |   | • | • | • | • | • | • | • | 1000 |
| Nature’s way alive premium formula multivitamin adult rubber animals                                             | • | • | • | • | • | • | • | • | • | • | • | • | • | • |   | 1200 |
| Garden of Life Vegetarian Vitamin Supplement for Men Vitamin                                                     | • | • | • | • | • | • | • | • | • | • | • | • | • | • | • | 1600 |
| Olimp Vita-Min One                                                                                               | • | • | • | • | • | • | • | • | • | • | • | • | • | • |   | 1600 |
| Smarty Pants Women’s Complete Multivitamin Dietary Supplement                                                    | • | • | • | • | • | • | • | • | • | • | • | • | • | • | • | 2000 |
| Scitec essentials daily vita-min                                                                                 | • | • | • | • | • | • | • | • | • | • | • | • | • | • | • | 2000 |
| Rainbow light unisex adult women one multivitamin                                                                | • | • | • | • | • | • | • | • | • | • | • | • | • | • | • | 2000 |

‡recommended by the manufacturer for the elderly.

**Table S3.** Vitamin composition and daily vitamin D<sub>3</sub> supply provided by 33 multivitamin supplements commercialized by amazon.it®.

|                                                                                                                   | A | B <sub>1</sub> | B <sub>2</sub> | B <sub>3</sub> | B <sub>5</sub> | B <sub>6</sub> | B <sub>7</sub> | B <sub>8</sub> | B <sub>9</sub> | B <sub>12</sub> | C | E | K | D <sub>3</sub> (units/day) |
|-------------------------------------------------------------------------------------------------------------------|---|----------------|----------------|----------------|----------------|----------------|----------------|----------------|----------------|-----------------|---|---|---|----------------------------|
| Epresat Multi-Vitam                                                                                               | • | •              | •              |                |                | •              |                |                |                |                 |   | • |   | 180                        |
| ACT Vita Multivitaminico                                                                                          | • | •              | •              | •              | •              | •              |                | •              | •              | •               | • | • | • | 200                        |
| Multicentrum Adulti Effervescente                                                                                 | • | •              | •              |                | •              | •              |                | •              | •              | •               | • | • | • | 200                        |
| Nu3 premium vegan essential multivitaminico                                                                       |   |                | •              |                |                |                |                |                |                | •               | • |   | • | 200                        |
| Multivitaminico A-Z vit4ever                                                                                      | • | •              | •              | •              | •              | •              | •              |                | •              |                 | • | • |   | 200                        |
| Leotron vitaminas jales                                                                                           | • | •              | •              | •              | •              | •              |                | •              | •              | •               | • | • |   | 200                        |
| Vitamaze multivitaminico                                                                                          | • | •              | •              | •              | •              | •              | •              |                | •              | •               | • | • |   | 200                        |
| Multivit integratore alimentare multivitaminico                                                                   | • | •              | •              | •              |                | •              |                | •              |                | •               | • | • | • | 200                        |
| Equilibra multivitamine & minerali                                                                                | • | •              | •              |                | •              | •              |                | •              | •              | •               | • | • |   | 200                        |
| Multivitaminico masticabile nutilite                                                                              |   | •              | •              | •              | •              | •              |                | •              | •              | •               | • | • |   | 200                        |
| Sustenium bioritmo 3 donna—integratore multivitaminico con antiossidanti e Sali minerali                          | • | •              |                |                | •              | •              | •              |                | •              | •               | • | • |   | 200                        |
| Syform multivitaminico naturale                                                                                   | • | •              | •              | •              |                | •              |                | •              | •              | •               | • | • | • | 280                        |
| Syform multivitaminico naturale integratore alimentare                                                            | • | •              | •              | •              |                | •              |                | •              | •              | •               | • | • | • | 280                        |
| Vitabiotics Wellwoman Multivitaminico Gummies                                                                     |   | •              | •              | •              |                |                |                |                |                |                 | • | • | • | 400                        |
| GNC WOMEN'S Ultra mega active                                                                                     | • | •              | •              |                | •              | •              |                | •              | •              | •               | • |   |   | 400                        |
| Multicentrum uomo integratore                                                                                     | • | •              | •              | •              | •              | •              |                | •              | •              | •               | • | • | • | 400                        |
| Dr. Giorgini Vitamine Maximum Complex                                                                             | • | •              | •              |                | •              | •              |                | •              | •              | •               | • | • | • | 600                        |
| Jamieson Prenatal Multivitamin *                                                                                  | • | •              | •              | •              | •              | •              |                | •              | •              | •               | • | • | • | 600                        |
| Dr. Giorgini integratore alimentare                                                                               | • | •              | •              | •              | •              | •              |                | •              | •              | •               | • | • | • | 600                        |
| Platinum naturals prenatal easymulti *                                                                            | • | •              | •              | •              | •              | •              |                |                | •              | •               | • | • | • | 600                        |
| Platinum naturals easymulti teen for young men                                                                    | • | •              | •              | •              | •              | •              |                |                | •              | •               | • | • |   | 800                        |
| Complete premium prenatal multivitamin                                                                            | • | •              |                | •              | •              | •              |                | •              |                | •               | • | • | • | 900                        |
| Multivitamine 12                                                                                                  | • | •              | •              | •              | •              | •              | •              |                | •              | •               | • |   |   | 960                        |
| Multivita Her                                                                                                     | • | •              | •              | •              | •              | •              | •              | •              | •              | •               | • | • | • | 1000                       |
| Nutrivita multivitamines                                                                                          |   | •              | •              | •              | •              | •              |                | •              | •              | •               | • | • | • | 1000                       |
| Il Multi nutrienti bioattivi                                                                                      | • | •              | •              | •              | •              | •              | •              | •              | •              | •               | • | • | • | 1000                       |
| Mutant Multi Athlete's vitamin                                                                                    | • | •              | •              | •              | •              |                |                | •              | •              | •               | • | • | • | 1000                       |
| Platinum naturals easymulti vegan                                                                                 | • | •              | •              | •              |                | •              |                | •              | •              |                 | • | • |   | 1000                       |
| Multivitamine vegetali e minerali ad alto contenuto di vitamine B <sub>12</sub> , D <sub>3</sub> , K <sub>2</sub> | • | •              | •              | •              | •              | •              |                | •              | •              | •               | • | • | • | 1000                       |
| Yamamoto research integratore di vitamine e minerali donna                                                        | • | •              | •              | •              | •              | •              |                | •              | •              | •               | • | • | • | 1200                       |
| ExSeed Multi INtegratore di fertilità maschile                                                                    | • |                |                |                |                | •              |                |                | •              |                 | • |   |   | 1400                       |
| Dr. Giorgini Idea C-difese immunitarie                                                                            | • |                |                |                |                |                |                |                |                |                 | • | • |   | 2000                       |
| Women's multi                                                                                                     |   |                | •              |                | •              | •              |                | •              | •              | •               | • | • |   | 2000                       |

\* recommended by the manufacturer for pregnancy and lactation.

**Table S4.** Vitamin composition and daily vitamin D<sub>3</sub> supply provided by 16 multivitamin supplements commercialized by amazon.fr®.

|                                                                              | A | B <sub>1</sub> | B <sub>2</sub> | B <sub>3</sub> | B <sub>5</sub> | B <sub>6</sub> | B <sub>7</sub> | B <sub>8</sub> | B <sub>9</sub> | B <sub>12</sub> | C | E | K | D <sub>3</sub> (units/day) |
|------------------------------------------------------------------------------|---|----------------|----------------|----------------|----------------|----------------|----------------|----------------|----------------|-----------------|---|---|---|----------------------------|
| GPH diffusion multivitamines et minéraux                                     | • | •              | •              | •              | •              | •              |                | •              | •              | •               | • | • |   | 100                        |
| Multi vitamines & minéraux/NAKURU Boost                                      | • | •              | •              | •              | •              | •              |                | •              | •              | •               | • | • |   | 100                        |
| Puritae multivitamines et minéraux                                           | • | •              | •              |                | •              | •              |                |                | •              | •               | • | • |   | 134                        |
| Multivitamine liposomale en solution liquide pour un corps sain et résistant | • | •              | •              | •              | •              | •              |                | •              | •              | •               | • | • |   | 200                        |
| Arkopharma azinc forme et vitalité                                           | • | •              | •              | •              | •              | •              |                | •              | •              | •               | • | • |   | 200                        |
| Tablets bargains multivitamines et fer                                       | • | •              | •              | •              | •              | •              | •              |                | •              | •               | • | • | • | 200                        |
| Trec nutrition multipack multivitamines et multiminéraux                     | • | •              | •              | •              | •              | •              | •              | •              | •              | •               | • | • |   | 200                        |
| Multivit energy adult                                                        | • | •              | •              | •              | •              | •              |                | •              | •              | •               | • | • |   | 200                        |
| Suravitasan multivitamines et minerals                                       |   | •              | •              | •              | •              | •              |                | •              | •              | •               | • | • |   | 300                        |
| Multicentrum homme                                                           | • | •              | •              | •              | •              | •              |                | •              | •              | •               | • | • | • | 400                        |
| 12 defenses immunoenergy vitamines pour la fatigue                           | • |                |                |                |                | •              |                |                | •              | •               | • | • |   | 400                        |
| Now Foods Adam men superior multi-vitamine pour homme                        | • | •              | •              | •              | •              | •              |                | •              | •              | •               | • | • | • | 500                        |
| Nutri advanced—immunoblast                                                   | • |                |                |                |                |                |                |                |                |                 | • | • |   | 500                        |
| Multicentrum complemento alimenticio mujer 50+ ‡                             | • | •              | •              | •              | •              | •              |                | •              | •              | •               | • | • | • | 600                        |
| Vegan vitality multivitamines et minéraux végétaliens                        | • | •              | •              | •              | •              | •              |                | •              | •              | •               | • | • | • | 800                        |
| Nature's way—alive multivitamines                                            | • | •              |                | •              | •              | •              |                | •              | •              | •               | • | • | • | 1000                       |

‡recommended by the manufacturer for the elderly.
